# Supplementary material for: Energy transfer assisted solvent effects on CsPbBr3 quantum dots
Source: Royal Society of Chemistry journal article supplement (doi:10.1039/c7tc03351f), 2017-01-01
Supplement: c7tc03351f1.pdf [file c7tc03351f1.pdf]

## Supporting information

# Energy transfer assisted solvent effects on CsPbBr<sub>3</sub> quantum dots

*Jingjing Mei,<sup>1,2</sup> Fei Wang,<sup>1,\*</sup> Yunpeng Wang,<sup>1</sup> Cancan Tian<sup>1,2</sup> Hongzhen Liu,<sup>1,2</sup>*

*Dongxu Zhao<sup>1,\*</sup>*

<sup>1</sup>State Key Laboratory of Luminescence and Applications, Changchun Institute of Optics, Fine Mechanics and Physics, Chinese Academy of Sciences, 3888 Dongnanhu Road, Changchun 130021, People's Republic of China

<sup>2</sup>University of Chinese Academy of Sciences, Beijing 100049, People's Republic of China

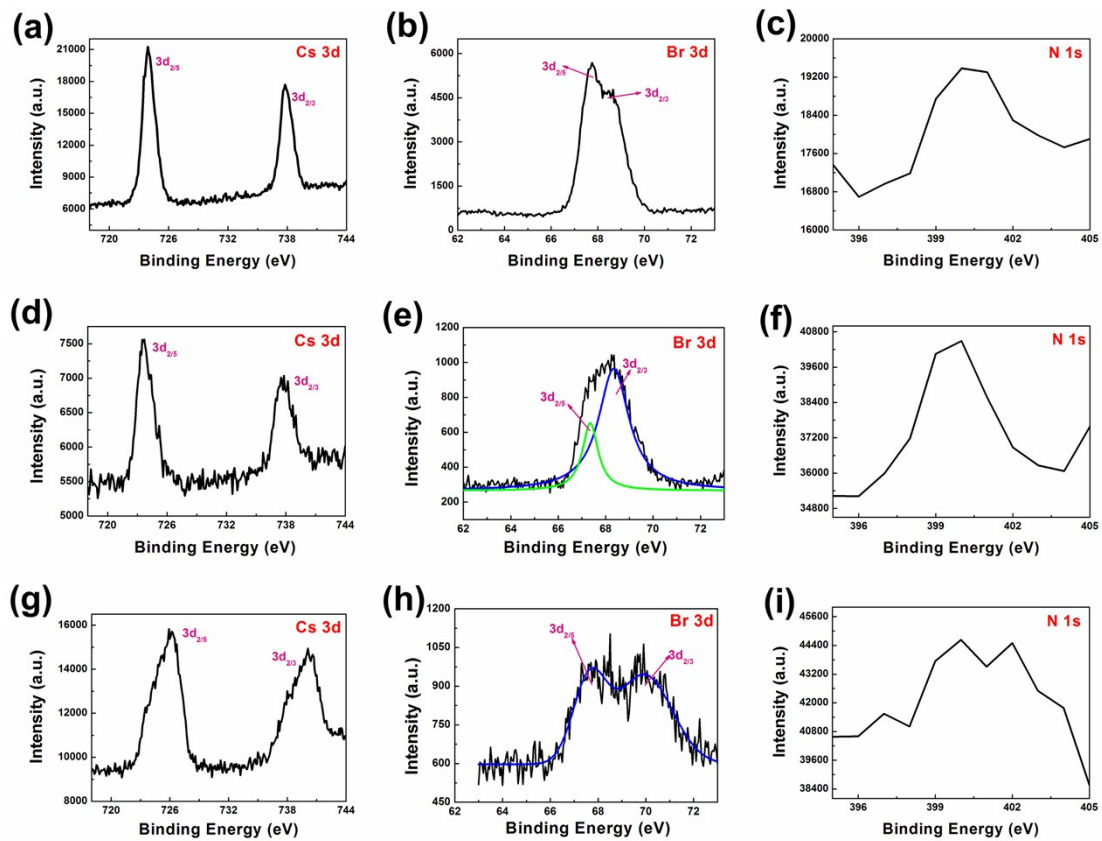

Figure S1. XPS spectra of CsPbBr<sub>3</sub> QDs dispersed in hexane (a, b, c), ethanol (d, e, f) and acetone (g, h, i).

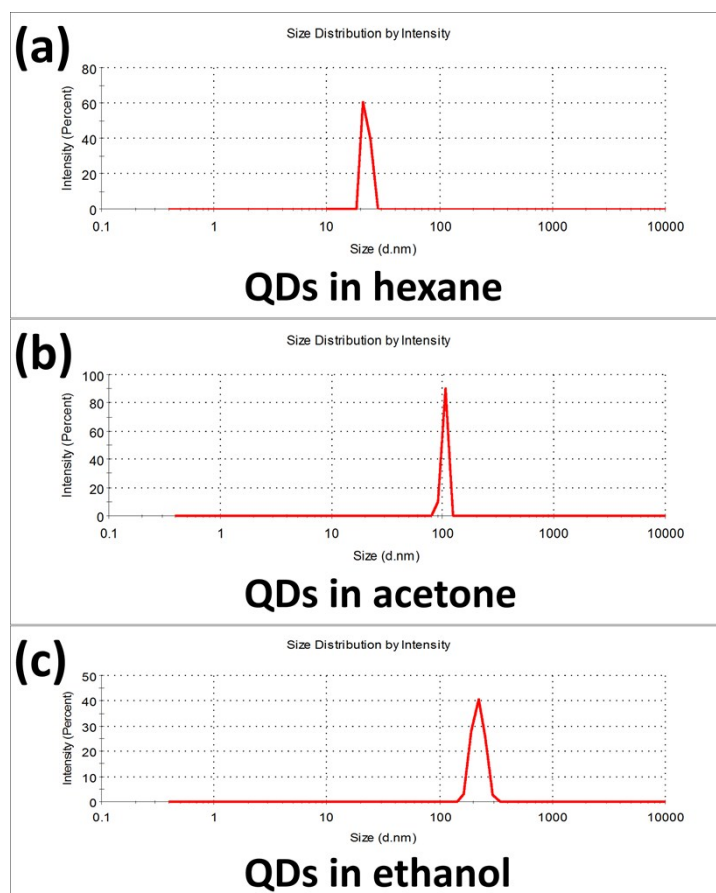

Figure S2. DLS data for (a) QDs in hexane, (b) QDs in acetone and (c) QDs in ethanol.

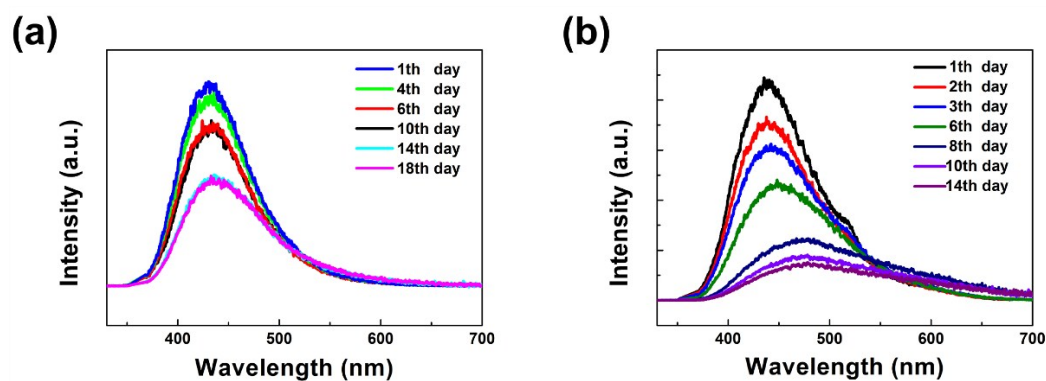

Figure S3. The fluorescent spectra of CsPbBr<sub>3</sub> QDs dispersed in ethanol (a)/acetone (b) for the different time. (Exciting wavelength: 360 nm)

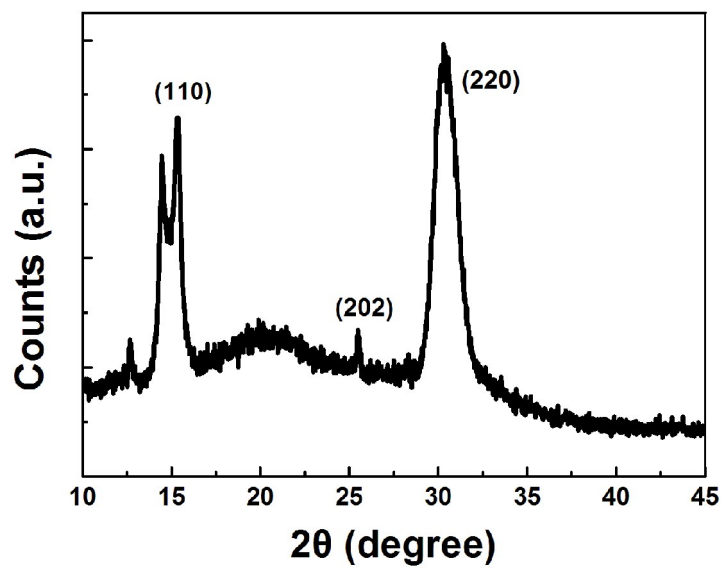

Figure S4. XRD patterns of CsPbBr<sub>3</sub> QDs before the polar solvent treatment.

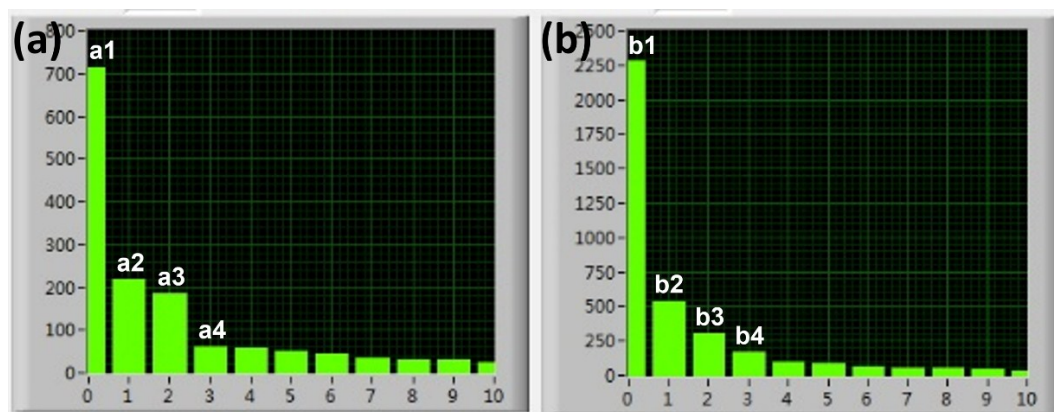

Figure S5. The proportions of the spectra in Fig. 9 after the SVD analysis process.
